# Supplementary material for: Transcriptional profile and Epstein-Barr virus infection status of laser-cut immune infiltrates from the brain of patients with progressive multiple sclerosis
Source: PubMed Central journal article supplement (PMC5771146; doi:10.1186/s12974-017-1049-5), 2018-01-16
Supplement: 12974_2017_1049_MOESM1_ESM.pdf [file 12974_2017_1049_MOESM1_ESM.pdf]

### Initial sample cohort selected for RNA quality control and neuropathological assessment

| MS case                                | Sex/<br>Age at<br>death | Disease<br>duration<br>(years) | Cause of death                      | Post<br>mortem<br>delay<br>(hours) | Number of<br>brain<br>tissue<br>blocks<br>used for<br>RNA<br>extraction | Number<br>of brain<br>tissue<br>blocks<br>with RIN<br>≥6 | Number<br>of brain<br>tissue<br>blocks<br>used for<br>LCM |
|----------------------------------------|-------------------------|--------------------------------|-------------------------------------|------------------------------------|-------------------------------------------------------------------------|----------------------------------------------------------|-----------------------------------------------------------|
| MS46**                                 | M/40                    | 24                             | MS                                  | 18                                 | 1                                                                       | 1                                                        | 0                                                         |
| MS79                                   | F/49                    | 21                             | Bronchopneumonia,<br>MS             | 7                                  | 3                                                                       | 3                                                        | 3                                                         |
| MS92                                   | F/37                    | 17                             | MS                                  | 26                                 | 7                                                                       | 7                                                        | 3                                                         |
| MS121                                  | F/49                    | 14                             | MS                                  | 24                                 | 6                                                                       | 5                                                        | 2                                                         |
| MS153**                                | F/50                    | 32                             | MS                                  | 12                                 | 3                                                                       | 3                                                        | 0                                                         |
| MS154                                  | F/34                    | 11                             | Pneumonia                           | 12                                 | 4                                                                       | 4                                                        | 2                                                         |
| MS160                                  | F/44                    | 15                             | Aspiration<br>pneumonia, MS         | 18                                 | 7                                                                       | 3                                                        | 2                                                         |
| MS176                                  | M/37                    | 27                             | Intestinal<br>obstruction, MS       | 12                                 | 1                                                                       | 1                                                        | 1                                                         |
| MS180                                  | F/44                    | 18                             | MS                                  | 9                                  | 8                                                                       | 7                                                        | 2                                                         |
| MS229**                                | M/53                    | 16                             | MS                                  | 13                                 | 1                                                                       | 1                                                        | 0                                                         |
| MS234                                  | F/39                    | 15                             | Pulmonary<br>embolism,<br>pneumonia | 15                                 | 4                                                                       | 4                                                        | 3                                                         |
| MS286**                                | M/45                    | 16                             | MS                                  | 7                                  | 1                                                                       | 1                                                        | 0                                                         |
| MS289**                                | M/45                    | 18                             | MS                                  | 9                                  | 3                                                                       | 3                                                        | 0                                                         |
| MS317**                                | F/48                    | 30                             | Aspiration<br>pneumonia, MS         | 21                                 | 2                                                                       | 2                                                        | 0                                                         |
| MS325**                                | M/51                    | 3                              | Bronchopneumonia                    | 13                                 | 2                                                                       | 2                                                        | 0                                                         |
| MS330                                  | F/59                    | 40                             | Pneumonia, MS                       | 21                                 | 1                                                                       | 1                                                        | 1                                                         |
| MS342**                                | F/35                    | 6                              | MS                                  | 9                                  | 1                                                                       | 1                                                        | 0                                                         |
| MS352*                                 | M/43                    | 19                             | Bronchopneumonia,<br>MS             | 26                                 | 4                                                                       | 0                                                        | 0                                                         |
| MS356*                                 | F/45                    | 17                             | MS                                  | 10                                 | 3                                                                       | 0                                                        | 0                                                         |
| MS402                                  | M/46                    | 21                             | Bronchopneumonia,<br>MS             | 12                                 | 3                                                                       | 3                                                        | 1                                                         |
| MS407                                  | F/44                    | 19                             | Septicaemia,<br>pneumonia           | 22                                 | 3                                                                       | 3                                                        | 3                                                         |
| MS422**                                | M/58                    | 13                             | Chest infection, MS                 | 25                                 | 1                                                                       | 1                                                        | 0                                                         |
| Total<br>number<br>of tissue<br>blocks |                         |                                |                                     |                                    | 69                                                                      | 56                                                       | 23                                                        |

Frozen brain tissue blocks from 22 patients dying during the progressive phase of MS were included in the quality control analysis. Most patients had developed secondary progressive MS, except MS121 and MS234 cases who had developed relapsing progressive MS, and MS176 and MS325 cases who had developed primary progressive MS. Only tissue blocks with RIN  $\geq 6$  underwent

neuropathological analysis. Among these, only tissue blocks containing substantial immune infiltrates in the meninges and/or white matter were used for LCM (last column on the right).

\* Cases whose brain samples did not pass the RNA quality control step and were excluded from subsequent neuropathological assessment.

\*\* Cases whose brain samples were excluded from the final sample cohort due to absence of substantial immune infiltrates in the meninges and/or white matter.
