# Supplementary material for: Transcriptional profile and Epstein-Barr virus infection status of laser-cut immune infiltrates from the brain of patients with progressive multiple sclerosis
Source: PubMed Central journal article supplement (PMC5771146; doi:10.1186/s12974-017-1049-5), 2018-01-16
Supplement: 12974_2017_1049_MOESM3_ESM.pdf [file 12974_2017_1049_MOESM3_ESM.pdf]

## List of Taqman inventoried assays used to study cellular gene expression

| Gene                                                   | Assay code    | Gene                                                       | Assay code    |
|--------------------------------------------------------|---------------|------------------------------------------------------------|---------------|
| Glyceraldehyde 3-phosphate dehydrogenase (GAPDH)       | Hs99999905_m1 | IL22                                                       | Hs01574154_m1 |
| CD4                                                    | Hs01058407_m1 | IL23 subunit alpha (p19)                                   | Hs00900828_g1 |
| CD8A                                                   | Hs00233520_m1 | Epstein-Barr virus induced gene 3 (EBI3)                   | Hs01057148_m1 |
| CD20                                                   | Hs00544818_m1 | IL-27 subunit alpha (p28)                                  | Hs00377366_m1 |
| CD138                                                  | Hs00896423_m1 | Interferon $\gamma$ (IFN $\gamma$ )                        | Hs00174143_m1 |
| B cell maturation antigen (BCMA)                       | Hs03045080_m1 | Interferon beta (IFN- $\beta$ )                            | Hs01077958_s1 |
| Natural Killer Cell p46-related protein (NKp46)        | Hs00183118_m1 | Interferon regulatory factor 3 (IRF3)                      | Hs01547283_m1 |
| CD56                                                   | Hs00941830_m1 | Interferon regulatory factor 7 (IRF7)                      | Hs00185375_m1 |
| CD68                                                   | Hs00154355_m1 | Interferon regulatory factor 8 (IRF8)                      | Hs00175238_m1 |
| CD1a                                                   | Hs00381754_g1 | Myxovirus (influenza virus) resistance A gene (MxA or Mx1) | Hs00895608_m1 |
| Blood dendritic cell antigen 2 (BDCA2)                 | Hs01092462_m1 | 2'-5'oligoadenylate synthetase 1 (OAS1)                    | Hs00973637_m1 |
| TBX21/T box expressed in T cells (Tbet)                | Hs00203436_m1 | Ubiquitin specific peptidase 18 (Usp18)                    | Hs00276441_m1 |
| Eomesodermin (EOMES)                                   | Hs00172872_m1 | IFN $\alpha$ receptor 1 (IFN $\alpha$ R1)                  | Hs01066118_m1 |
| Forkhead box P3 (Foxp3)                                | Hs01085834_m1 | IL28A                                                      | Hs00820125_g1 |
| RAR-related orphan receptor C (RORC)                   | Hs01076122_m1 | IL29                                                       | Hs00601677_g1 |
| CD69                                                   | Hs00934033_m1 | Tumor necrosis factor (TNF)                                | Hs00174128_m1 |
| CD160                                                  | Hs00199894_m1 | Lymphotoxin (LT) $\alpha$                                  | Hs04188773_g1 |
| CD161                                                  | Hs00174469_m1 | LT $\beta$                                                 | Hs00242739_m1 |
| Perforin                                               | Hs00169473_m1 | Metalloproteinase 9 (MMP9)                                 | Hs00234579_m1 |
| Granzyme A                                             | Hs00989184_m1 | Granulocyte-macrophage colony stimulating factor (GM-CSF)  | Hs00929873_m1 |
| Granzyme B                                             | Hs01554355_m1 | Inducible nitric oxide synthase (iNOS)                     | Hs01075529_m1 |
| HLA-DRA or major histocompatibility complex II (MHCII) | Hs00219575_m1 | Cyclooxygenase-2 (Cox-2)                                   | Hs00153133_m1 |
| CD86                                                   | Hs01567026_m1 | Chemokine (C-C motif) ligand 2 (CCL2)                      | Hs00234140_m1 |
| BCL-6                                                  | Hs00277037_m1 | CCL5                                                       | Hs00982282_m1 |
| CD10                                                   | Hs00153510_m1 | CCL19                                                      | Hs00171149_m1 |
| Activation-induced cytidine deaminase (AID)            | Hs00757808_m1 | CCL20                                                      | Hs01011368_m1 |
| B cell activating factor (BAFF)                        | Hs00198106_m1 | CCL21                                                      | Hs00989654_g1 |
| Interleukin (IL) 1 $\beta$                             | Hs01555410_m1 | C-X-C motif chemokine 10 ligand (CXCL10)                   | Hs00171042_m1 |
| IL2                                                    | Hs00174114_m1 | CXCL12                                                     | Hs00171022_m1 |
| IL4                                                    | Hs00174122_m1 | CXCL13                                                     | Hs00757930_m1 |
| IL6                                                    | Hs00985639_m1 | C-C chemokine receptor type 5 (CCR5)                       | Hs99999149_s1 |
| IL9                                                    | Hs00914237_m1 | CCR6                                                       | Hs01890706_s1 |
| IL10                                                   | Hs00961622_m1 | Chemokine (C-X-C motif) receptor 3 (CXCR3)                 | Hs01847760_s1 |
| IL12 subunit beta (p40)                                | Hs01011518_m1 | CXCR5                                                      | Hs00540548_s1 |
| IL12 subunit alpha (p35)                               | Hs01073447_m1 | Retinoic acid-inducible gene 1 (RIG1)                      | Hs00184937_m1 |
| IL15                                                   | Hs01003716_m1 | Toll-like receptor 3 (TLR3)                                | Hs01551078_m1 |
| IL17A                                                  | Hs00174383_m1 | TLR9                                                       | Hs00152973_m1 |
| IL18                                                   | Hs01038788_m1 | Ki67                                                       | Hs01032443_m1 |
