# Supplementary material for: Transcriptional profile and Epstein-Barr virus infection status of laser-cut immune infiltrates from the brain of patients with progressive multiple sclerosis
Source: PubMed Central journal article supplement (PMC5771146; doi:10.1186/s12974-017-1049-5), 2018-01-16
Supplement: 12974_2017_1049_MOESM4_ESM.pdf [file 12974_2017_1049_MOESM4_ESM.pdf]

**List of Taqman self-designed primers and probes used to study EBV gene expression**

| Gene                                | Forward primer             | Reverse primer           | FAM-labelled probe      |
|-------------------------------------|----------------------------|--------------------------|-------------------------|
| EBV encoded small RNA (EBER) 1      | GTTGCCCTAGTGGTTTCG         | CCCCGGGACTTGACC          | ACACACCGCCAACGCTCAGT    |
| EBV nuclear antigen (EBNA) 3A       | GCCCCGTGTCCGGTAG           | GAGTTGATCCCCTGGAGATACAG  | CACAGGCCCCACCTAC        |
| EBV latent membrane protein (LMP) 1 | GGACAACGACACAGTGATGAACA    | CATCGGTAGCTTGTTGAGGGT    | CCACCACGATGACTCC        |
| LMP2A                               | GAGATGGCGCCGTTTGAC         | TGAGGACAAGTACACATGCCAAAA | ATGCCGCCACAAACA         |
| BZLF1                               | CTCAACCTGGAGACAATTCTACTGT  | TGCTAGCTGTTGTCCTTGGTTAG  | CTGCTGCTGCTGTTTG        |
| gp350/220                           | AGA ATC TGG GCT GGG ACG TT | ACATGGAGCCCGGACAAGT      | AGCCCACCACAGATTACGGCGGT |
