# Supplementary material for: Transcriptional profile and Epstein-Barr virus infection status of laser-cut immune infiltrates from the brain of patients with progressive multiple sclerosis
Source: PubMed Central journal article supplement (PMC5771146; doi:10.1186/s12974-017-1049-5), 2018-01-16
Supplement: 12974_2017_1049_MOESM5_ESM.pdf [file 12974_2017_1049_MOESM5_ESM.pdf]

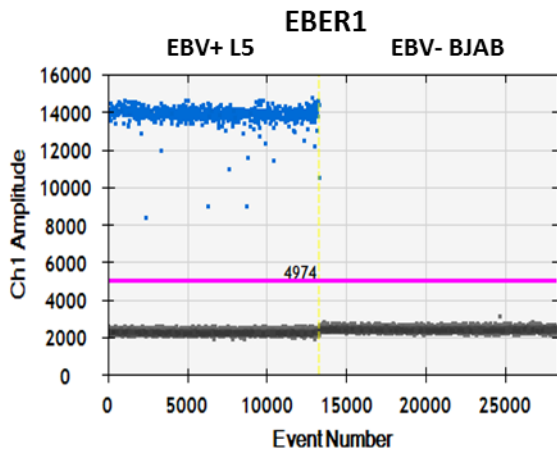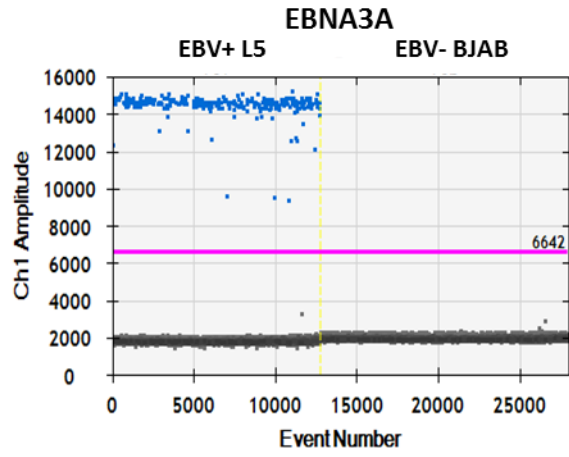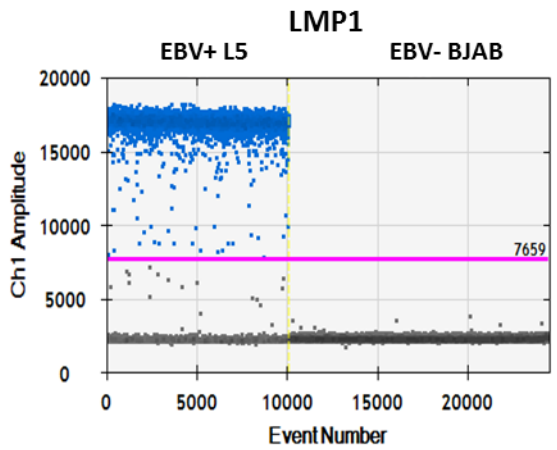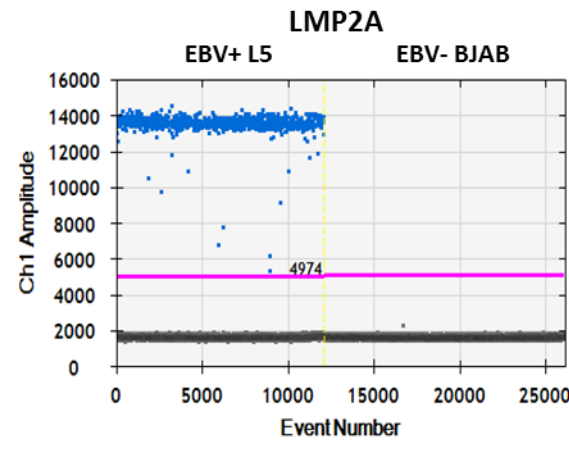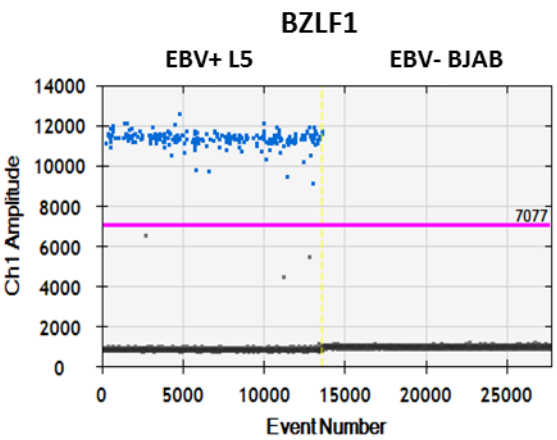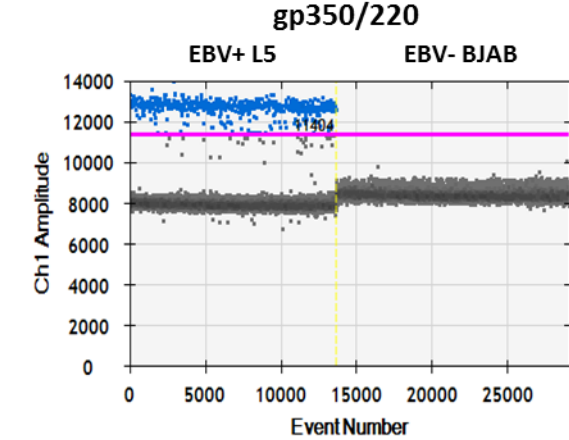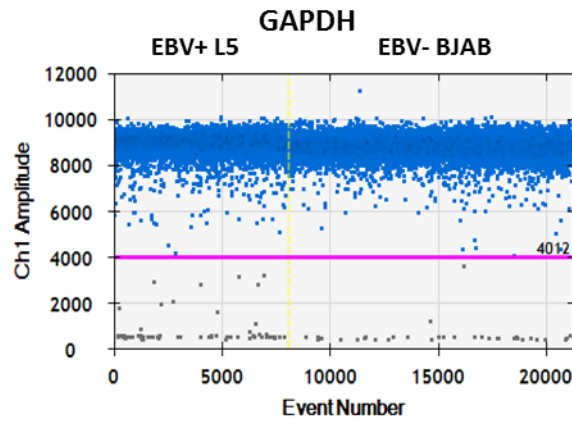

**Assessment of the specificity of the EBV gene expression assays using droplet digital (dd) PCR.** To verify that the specificity of the self-designed EBV gene expression assays used for real time RT-PCR was preserved in a digital PCR system, cDNA from the EBV+ lymphoblastoid cell line L5 and the EBV-negative B lymphoma cell line BJAB were preamplified (14 cycles) for the indicated EBV transcripts together with the housekeeping gene GAPDH and then analyzed using the Bio-Rad QX200 ddPCR System. The blue dots over the threshold (pink line) represent the droplets with detectable target amplification while the underlying grey dots represent the negative droplets. All viral transcripts were amplified in the EBV+ LCL while no signal was present in EBV-negative BJAB cells, confirming the high specificity of the assays. The same amount of cDNA input was used for both cell lines, as demonstrated by the comparable levels of GAPDH detected. For each transcript, one experiment representative of 3 performed is shown.
