# Supplementary material for: Transcriptional profile and Epstein-Barr virus infection status of laser-cut immune infiltrates from the brain of patients with progressive multiple sclerosis
Source: PubMed Central journal article supplement (PMC5771146; doi:10.1186/s12974-017-1049-5), 2018-01-16
Supplement: 12974_2017_1049_MOESM7_ESM.pdf [file 12974_2017_1049_MOESM7_ESM.pdf]

EBV gene expression in laser-cut immune infiltrates from the MS brain

| MS case | n° laser-cut immune infiltrates EBV positive/ analysed (% positive) | Localization of EBV positive samples | EBV latent transcripts  | EBV lytic transcripts |
|---------|---------------------------------------------------------------------|--------------------------------------|-------------------------|-----------------------|
| MS79    | 2/6 (33%)                                                           | Meninges #1                          | EBNA3A                  |                       |
|         |                                                                     | Meninges #2                          | EBNA3A<br>LMP1          | gp350/220             |
| MS92    | 7/13 (54%)                                                          | Meninges #1                          | LMP1                    |                       |
|         |                                                                     | Meninges #2                          | LMP1                    |                       |
|         |                                                                     | Meninges #3                          | EBER1<br>EBNA3A         | gp350/220             |
|         |                                                                     | WM #4                                | EBER1<br>EBNA3A<br>LMP1 |                       |
|         |                                                                     | WM #5                                | LMP1                    |                       |
|         |                                                                     | WM #6                                | EBNA3A                  | BZLF1                 |
|         |                                                                     | WM #7                                | EBER1                   |                       |
| MS121   | 2/7 (29%)                                                           | WM #1                                | EBER1                   |                       |
|         |                                                                     | WM #2                                | EBER1<br>EBNA3A         |                       |
| MS160   | 1/2 (50%)                                                           | Meninges #1                          | EBER1<br>EBNA3A         |                       |
| MS176   | 2/5 (40%)                                                           | Meninges #1                          | LMP1                    |                       |
|         |                                                                     | WM #2                                | EBNA3A<br>LMP1          |                       |
| MS180   | 9/16 (56%)                                                          | Meninges #1                          | LMP1                    |                       |
|         |                                                                     | Meninges #2                          | EBER1<br>LMP1           |                       |
|         |                                                                     | Meninges #3                          |                         | BZLF1                 |
|         |                                                                     | Meninges #4                          |                         | BZLF1                 |
|         |                                                                     | Meninges #5                          | EBER1                   |                       |
|         |                                                                     | WM #6                                | EBER1                   |                       |
|         |                                                                     | WM #7                                | EBER1                   |                       |
|         |                                                                     | WM #8                                | EBER1                   |                       |
|         |                                                                     | WM #9                                | LMP1                    |                       |
| MS234   | 4/6 (67%)                                                           | Meninges #1                          | EBER1                   |                       |
|         |                                                                     | Meninges #2                          | EBER1                   |                       |
|         |                                                                     | Meninges #3                          | EBER1<br>LMP2A          |                       |
|         |                                                                     | Meninges #4                          | EBER1<br>LMP1           |                       |
| MS330   | 2/2 (100%)                                                          | Meninges #1                          | EBER1<br>LMP1<br>LMP2A  |                       |
|         |                                                                     | Meninges #2                          | LMP1                    |                       |
| MS407   | 2/11 (18%)                                                          | Meninges #1                          | EBER1                   |                       |
|         |                                                                     | Meninges #2                          | LMP2A                   |                       |

The fraction of microdissected samples with detectable EBV gene expression from 9 of 11 MS cases analyzed and the localization of the EBV+ immune infiltrates for each MS case are shown in the 2<sup>nd</sup> and 3<sup>rd</sup> column, respectively. The EBV latent and lytic transcripts detected in the individual immune infiltrates are shown in the 4<sup>th</sup> and 5<sup>th</sup> column, respectively.
